# Supplementary material for: Balancing flexibility and stress in DNA nanostructures
Source: Royal Society of Chemistry journal article supplement (doi:10.1039/b513962g), 2006-01-01

# Balancing flexibility and stress in DNA nanostructures

Yu He and Chengde Mao\*

Purdue University, Department of Chemistry, West Lafayette, Indiana 47907, USA

## Supplementary Information

### Experimental Methods

**Oligonucleotides.** DNA sequences have been designed by a computer program “SEQUIN” (Seeman, N. C. *J. Biomol. Struct. Dyn.* **1990**, *8*, 573-581). All oligonucleotides were purchased from IDT, Inc. and purified by 20% denaturing PAGE.

**Formation of DNA complexes/2D arrays.** Strands **1** (0.6  $\mu\text{M}$ ), **2** (1.8  $\mu\text{M}$ ) and **3** or **3A** (1.8  $\mu\text{M}$ ) were combined in Tris-Acetic-EDTA-Mg<sup>2+</sup> (TAE-Mg<sup>2+</sup>) buffer. Individual DNA complexes were formed by cooling mixture solutions as following: 95°C /1 min., 65°C/5 min., 50°C/5 min., 37°C/5 min., and 22°C/5 min. DNA 2D arrays were formed by slowing cooling DNA solution from 95°C from room temperature over 48 hours.

**Denaturing Polyacrylamide Gel Electrophoresis.** Gels contained 20% polyacrylamide (19:1 acrylamide/bisacrylamide) and 8.3 M urea; they were run at 55°C. The running buffer was Tris-Borate-EDTA buffer (TBE), which consisted of 89 mM Tris buffer (pH 8.0), 89 mM boric acid, and 2 mM EDTA. Gels were run at Hoefer SE 600 electrophoresis unit at 600V (constant voltage). After electrophoresis, the gels were stained with Stains-all dye (Sigma) and scanned.

**Native Polyacrylamide Gel Electrophoresis.** Gels contained 6% polyacrylamide (19:1 acrylamide/bisacrylamide) and were run on a FB-VE10-1 electrophoresis unit (FisherBiotech) at 4°C (100V, constant voltage). After electrophoresis, the gels were stained with Stains-all dye (Sigma) and scanned. TAE-Mg<sup>2+</sup> buffer was used for electrophoresis at pH 8.0.

**AFM Imaging.** A drop of 2  $\mu\text{L}$  DNA sample solution was spotted onto freshly cleaved mica surface, and sat there for 10 seconds to allow for strong adsorption. The sample drop was then washed off by 30  $\mu\text{L}$  10 mM Mg(Ac)<sub>2</sub> solution, and dried by compressed air. DNA samples and their metal replicas were imaged by tapping-mode AFM on Nanoscope IIIa (Digital Instruments) with NSC15 tips (silicon cantilever, MikroMasch). The tip-surface interaction was minimized by optimizing the scan set-point.

**DNA sequences.** Strand **1-T4**: 5'-Agg CAC CAT CgT Agg TTT TCT TgC CAg gCA CCA TCg TAg gTT TTC TTg CCA ggC ACC ATC gTA ggT TTT CTT gCC-3'; Strand **1-T3**: 5'-Agg CAC CAT CgT Agg TTT CTT gCC Agg CAC CAT CgT Agg TTT CTT gCC Agg CAC CAT CgT Agg TTT CTT gCC-3'; Strand **1-T2**: 5'-Agg CAC CAT CgT Agg TTC TTg CCA ggC ACC ATC gTA ggT TCT TgC CAg gCA CCA TCg TAg gTT CTT gCC-3'; Strand **1-T1**: 5'-Agg CAC CAT CgT Agg TCT TgC CAg gCA CCA TCg TAg gTC TTg CCA ggC ACC ATC gTA ggT CTT gCC-3'; Strand **1-T0**: 5'-Agg CAC CAT CgT Agg CTT gCC Agg CAC CAT CgT Agg CTT gCC Agg CAC CAT CgT Agg CTT gCC Agg CAC CAT CgT Agg CTT gCC-3'; strand **2**: 5'-ACT ATg CAA CCT gCC Tgg CAA gCC TAC gAT ggA CAC ggT AAC g-3'; strand **3**: 5'-CgT TAC CgT gTg gTT gCA TAG T-3'; strand **3A**: 5'-CgC gCg TTA CCg TgT ggT TgC ATA gTC ATg-3'.

Blunt-ended 3-point-star:

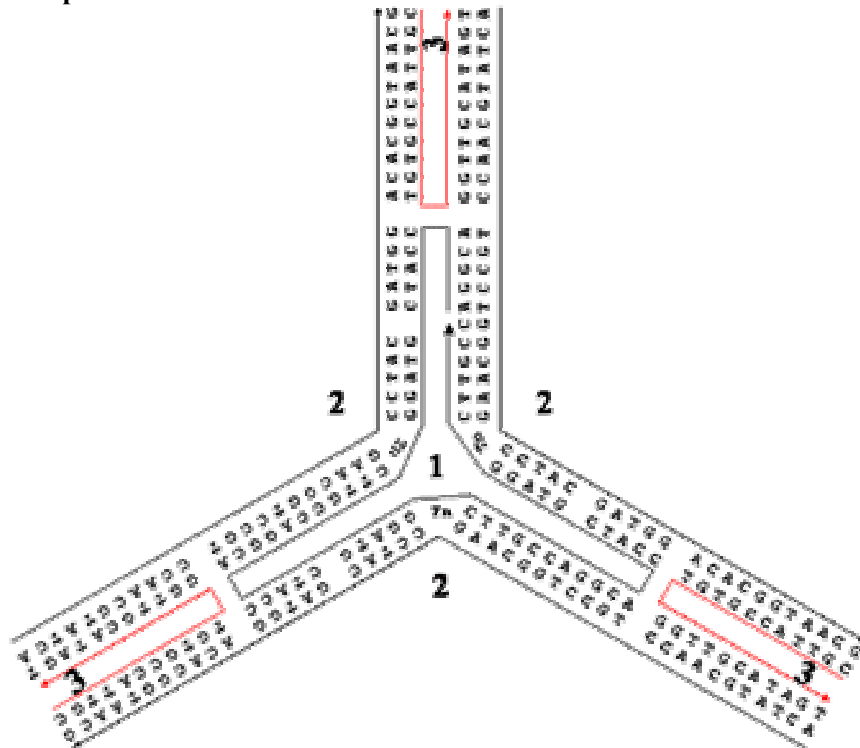

Sticky-ended 3-point-star:

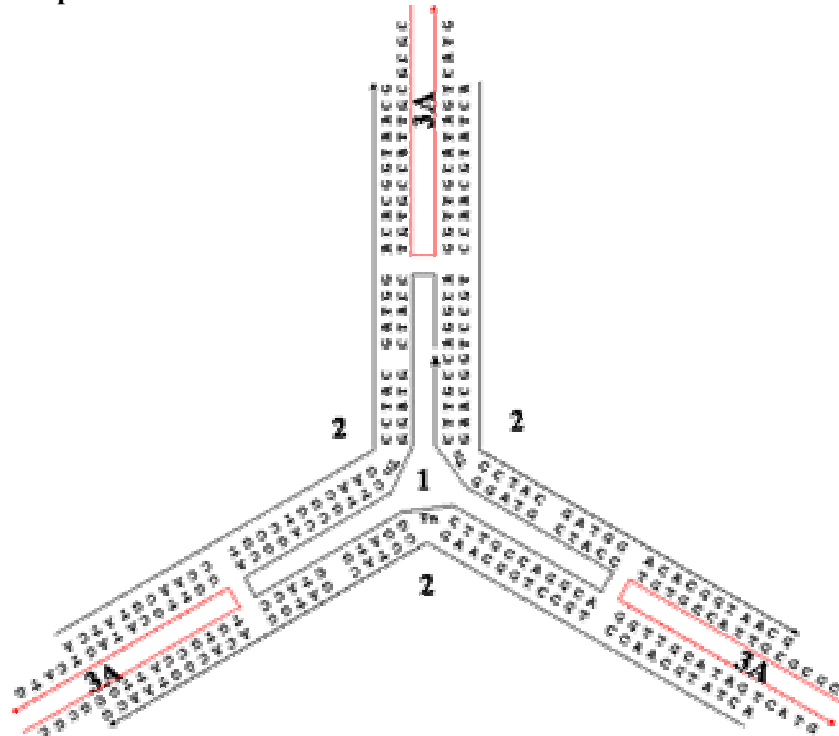

Supplement: b513962g.pdf [file b513962g.pdf]
